# Supplementary material for: Insights on the interaction of calcein with calcium carbonate and its implications in biomineralization studies
Source: Royal Society of Chemistry journal article supplement (doi:10.1039/c8ce00853a), 2018-01-01
Supplement: c8ce00853a1.pdf [file c8ce00853a1.pdf]

# Supporting information

## Insights on the interaction of calcein with calcium carbonate and implications in biomineralization studies

Giulia Magnabosco<sup>#,\*</sup>, Iryna Polishchuk<sup>‡</sup>, Jonathan Erez<sup>°</sup>, Simona Fermani<sup>#</sup>, Boaz Pokroy<sup>‡</sup>, Giuseppe Falini<sup>#,\*</sup>

<sup>#</sup> Dipartimento di chimica “Giacomo Ciamician”, Alma Mater Studiorum-Università di Bologna, via F. Selmi 2, 40126 Bologna, Italy

<sup>‡</sup> Department of Material Sciences and Engineering and the Russel Berrie Nanotechnology Institute Technion-Israel Institute of Technology, 32000 Haifa, Israel

<sup>°</sup> Institute of Earth Sciences, The Hebrew University of Jerusalem, Edmond Safra Campus, Jerusalem 91904, Israel

|                                                                      |   |
|----------------------------------------------------------------------|---|
| Experimental setup .....                                             | 2 |
| Confocal imaging.....                                                | 4 |
| Calcium content measurements .....                                   | 5 |
| Calcein loading relative to the starting solution concentration..... | 5 |
| Low magnification SEM images.....                                    | 6 |
| High resolution X-ray powder diffraction patterns .....              | 7 |
| Rietveld analysis results .....                                      | 9 |

## Experimental setup

### Crystal growth experiments

Calcite precipitation Calcium chloride dehydrate was purchased from Fluka, magnesium chloride hexahydrate was purchased from Sigma Aldrich and anhydrous ammonium carbonate was purchased from Acros Organics. All reagents were ACS grade and used as purchased. Calcium carbonate crystals were prepared using the vapour diffusion technique, consisting in the diffusion of  $\text{NH}_3$  and  $\text{CO}_2$  vapour obtained from the decomposition of 3.5 g of  $(\text{NH}_4)_2\text{CO}_3$  into 750  $\mu\text{L}$  of 10  $\mu\text{M}$   $\text{CaCl}_2$  solution contained in a 24-well multiwell dish containing glass coverslips and covered with aluminium foil with a hole of  $\varnothing 1$  mm on each well in a closed desiccator. The appropriate amount of additive was added to each well. The precipitation process was allowed to proceed for 4 days, after which each well was washed 3 times with DI water and once with ethanol.

Aragonite precipitation Calcium chloride dehydrate was purchased from Fluka, magnesium chloride hexahydrate was purchased from Sigma Aldrich and anhydrous ammonium carbonate was purchased from Acros Organics. All reagents were ACS grade and used as purchased. Calcium carbonate crystals were prepared using the vapour diffusion technique, consisting in the diffusion of  $\text{NH}_3$  and  $\text{CO}_2$  vapour obtained from the decomposition of 3.5 g of  $(\text{NH}_4)_2\text{CO}_3$  into 750  $\mu\text{L}$  of 10  $\mu\text{M}$   $\text{CaCl}_2$  solution contained in a 24-well multiwell dish containing glass coverslips and covered with aluminium foil with a hole of  $\varnothing 1$  mm on each well in a closed desiccator. The appropriate amount of additive was added to each well. To obtain aragonite  $\text{MgCl}_2$  was added to  $\text{CaCl}_2$  to obtain a 4:1 Mg:Ca ratio. The precipitation process was allowed to proceed for 4 days, after which each well was washed 3 times with DI water and once with ethanol.  $\text{Mg}^{2+}$  favours the precipitation of aragonite by (i) adsorbing on calcite nuclei and preventing the integration of  $\text{Ca}^{2+}$  in the lattice and (ii) forming magnesium calcite, which is more soluble than calcite and as soluble as aragonite.

Confocal imaging A Leica TCS SL microscope was used to perform confocal microscopy, using the software "Leica confocal software". Samples for confocal imaging were precipitated directly onto glass coverslip as described above and mounted on glass slides by using Canada balsam (Sigma Aldrich-C1795). Samples were irradiated with 488 nm laser and emission was observed in the 520 nm-700 nm range. Slices were collected in z-stack mode and stacked to obtain the presented images.

Calcein loading 750  $\mu\text{L}$  of 0.1 M citrate buffer pH 4.5 were added to each well in order to dissolve the crystals. Dissolution was allowed to proceed for 4 hours on a rocking plane. Absorbance spectra were collected using an Agilent Cary 300-Bio UV-Vis spectrophotometer and calcium content was measured with flame atomic absorption spectroscopy (Perkin-Elmer AAnalyst 100). The calcein content was computed by dividing the quantity of calcein obtained from the UV-Vis spectra by the calcium carbonate quantity computed by calcium measures with atomic absorption.

High resolution X-Ray diffraction High resolution X-Ray diffractogram were collected at Grenoble synchrotron using a wavelength of 0.4959 Å. Diffractogram were converted to Cu  $K\alpha$  wavelength (1.5406 Å) for easier understanding.

SEM imaging SEM images were collected using a HR-SEM (ULTRA Plus, Zeiss, Oberkochen, Germany) after coating the samples with 3 nm of gold.

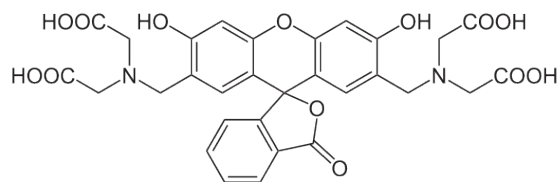

**Figure S11.** Calcein structure.

Confocal imaging

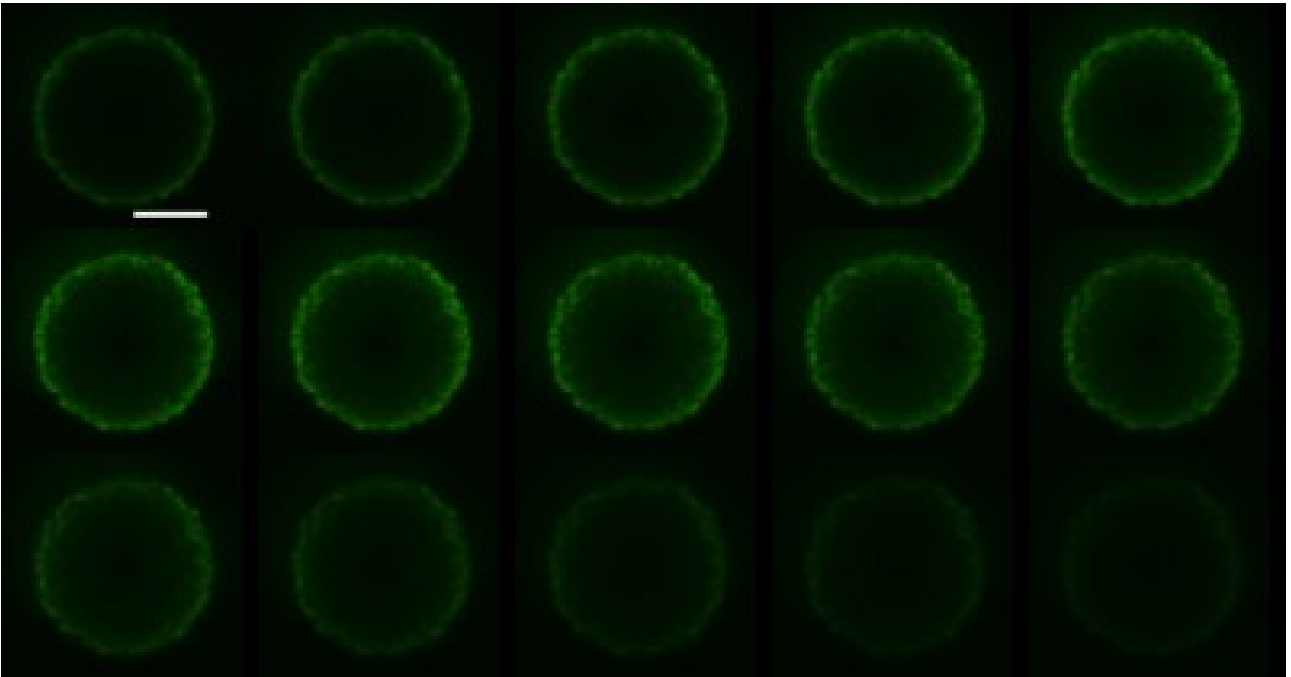

**Figure S12.** Confocal imaging of a calcite crystal grown in the presence of 400  $\mu\text{M}$  calcein. Scalebar is 30  $\mu\text{M}$ .

## Calcium content measurements

**Table S11.** Ca<sup>2+</sup> content measured with flame absorption atomic spectroscopy

| Calcein<br>( $\mu\text{M}$ ) | Aragonite         |                    |                   |                    | Calcite           |                    |                   |                    |
|------------------------------|-------------------|--------------------|-------------------|--------------------|-------------------|--------------------|-------------------|--------------------|
|                              | pristine          |                    | bleached          |                    | pristine          |                    | bleached          |                    |
|                              | loading<br>(mg/L) | st. dev.<br>(mg/L) |
| blank                        | 218.37            | 26.01              | 212.34            | 1.98               | 209.20            | 6.41               | 191.61            | 10.12              |
| 4                            | 235.26            | 7.58               | 213.87            | 16.12              | 225.25            | 6.41               | 223.68            | 5.13               |
| 40                           | 243.92            | 12.65              | 227.25            | 2.30               | 182.27            | 29.74              | 212.51            | 11.82              |
| 400                          | 214.90            | 13.35              | 214.77            | 4.09               | 136.71            | 12.91              | 139.54            | 14.10              |

## Calcein loading relative to the starting solution concentration

**Table S12.** Calcein loading into aragonite and calcite crystals relative to calcein concentration in the crystallization solution.

| Calcein<br>( $\mu\text{M}$ ) | Aragonite      |                 | Calcite        |                 |
|------------------------------|----------------|-----------------|----------------|-----------------|
|                              | loading<br>(%) | st. dev.<br>(%) | loading<br>(%) | st. dev.<br>(%) |
| 4                            | 9.67           | 1.91            | 5.81           | 0.41            |
| 40                           | 6.89           | 0.34            | 7.30           | 0.95            |
| 400                          | 4.44           | 0.79            | 3.27           | 0.20            |

**Table S13.** Calcein loading (wt.%) into aragonite and calcite crystals relative to the mass of calcium carbonate precipitated.

| Calcein<br>( $\mu\text{M}$ ) | Aragonite         |                    |                   |                    | Calcite           |                    |                   |                    |
|------------------------------|-------------------|--------------------|-------------------|--------------------|-------------------|--------------------|-------------------|--------------------|
|                              | pristine          |                    | bleached          |                    | pristine          |                    | bleached          |                    |
|                              | loading<br>(wt.%) | st. dev.<br>(wt.%) |
| blank*                       | 0.02              | 0.01               | 0.04              | 0.02               | 0.01              | 0.00               | 0.03              | 0.00               |
| 4                            | 0.04              | 0.01               | 0.02              | 0.00               | 0.03              | 0.00               | 0.03              | 0.00               |
| 40                           | 0.26              | 0.02               | 0.15              | 0.01               | 0.33              | 0.04               | 0.30              | 0.02               |
| 400                          | 2.33              | 0.31               | 1.71              | 0.12               | 2.60              | 0.11               | 2.54              | 0.04               |

\* This sample does not contain calcein.

Low magnification SEM images

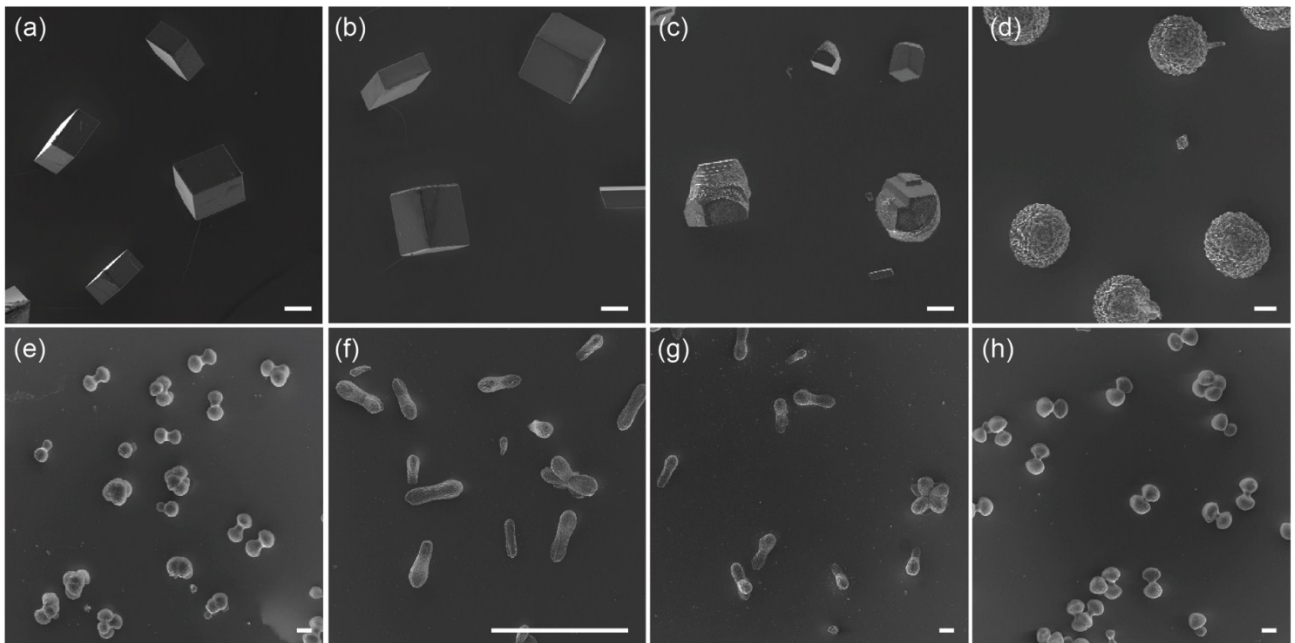

**Figure S13.** SEM images of crystals grown with 10 mM Ca<sup>2+</sup> (a) without additives and in the presence of (b) 4 μM. (c) 40 μM and (d) 400 μM calcein and crystals grown with 10 mM Ca<sup>2+</sup> and 40 mM Mg<sup>2+</sup> (e) without additives and in the presence of (f) 4 μM. (g) 40 μM and (h) 400 μM. Scale bar: 20 μm.

## High resolution X-ray powder diffraction patterns

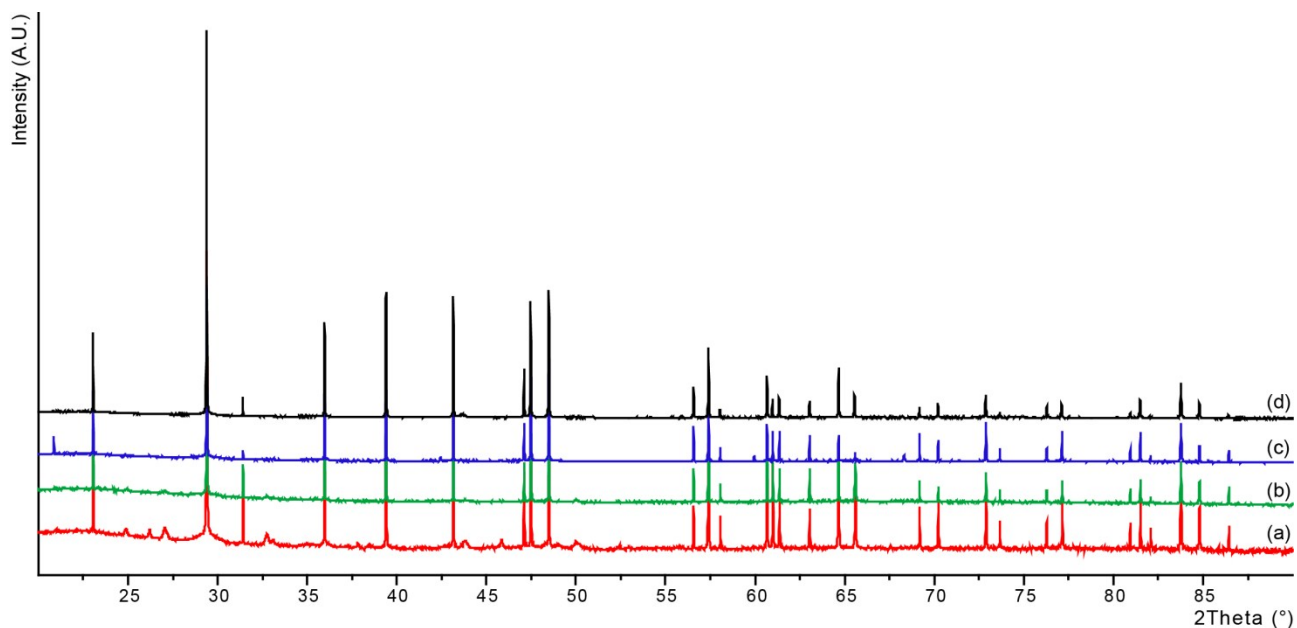

**Figure S14.** High resolution X-ray powder diffraction patterns of calcite crystals grown (a) without additives and in the presence of (b) 4  $\mu\text{M}$  (c) 40  $\mu\text{M}$  and (d) 400  $\mu\text{M}$  calcein. Wavelength converted from 0.4959  $\text{\AA}$  to 1.5406  $\text{\AA}$ .

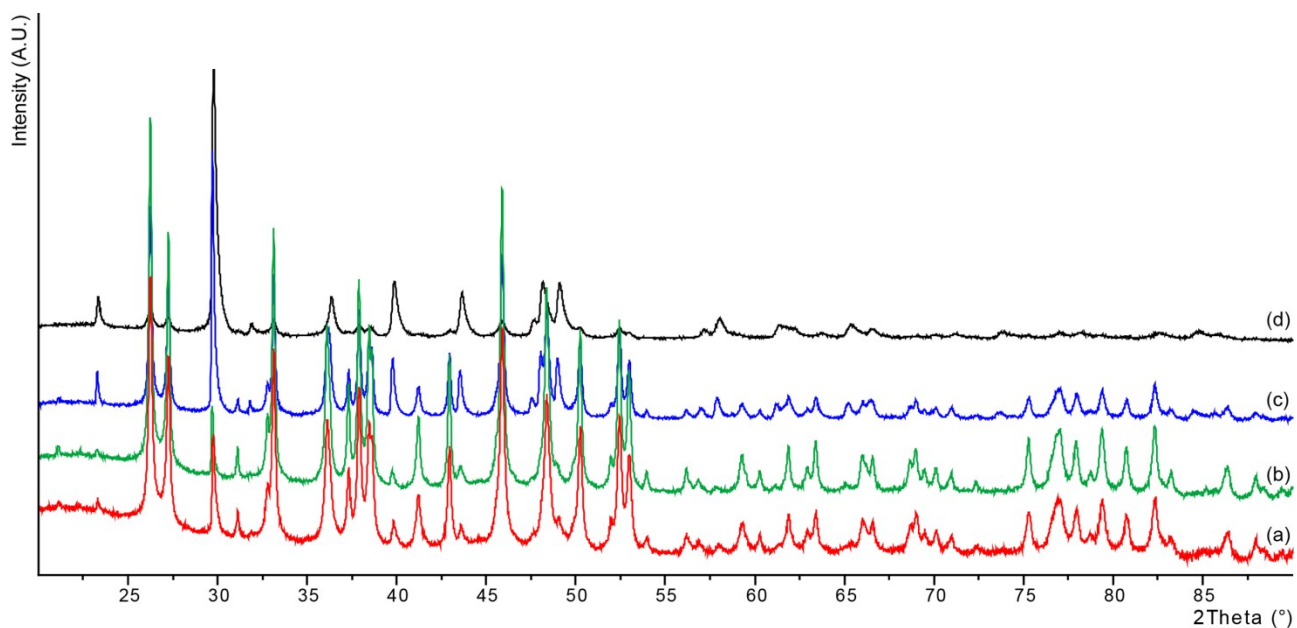

**Figure S15.** High resolution X-ray powder diffraction patterns of crystals grown from a solution containing 40 mM  $\text{Mg}^{2+}$  and 10 mM  $\text{Ca}^{2+}$  (a) without additives and in the presence of (b) 4  $\mu\text{M}$  (c) 40  $\mu\text{M}$  and (d) 400  $\mu\text{M}$  calcein. Wavelength converted from 0.4959  $\text{\AA}$  to 1.5406  $\text{\AA}$ .

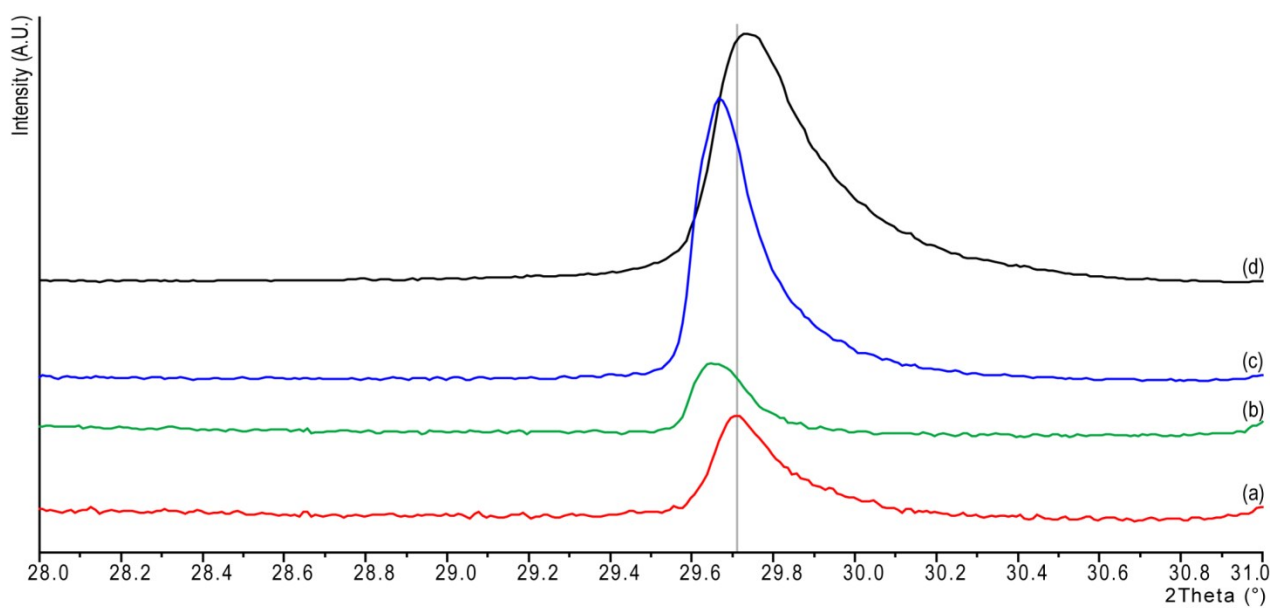

**Figure S16.** High resolution X-ray powder diffraction patterns in the 28 – 31  $2\theta(^{\circ})$  range of magnesium calcite crystals grown from a solution containing 40 mM  $Mg^{2+}$  and 10 mM  $Ca^{2+}$  (a) without additives and in the presence of (b) 4  $\mu M$  (c) 40  $\mu M$  and (d) 400  $\mu M$  calcein. Wavelength converted from 0.4959  $\text{\AA}$  to 1.5406  $\text{\AA}$ .



## Rietveld analysis results

**Table S14.** Aragonite and Mg-calcite content of samples grown in the presence of 40 mM Mg<sup>2+</sup> and 10 mM Ca<sup>2+</sup> in the presence of different calcein concentrations.

| Calcein / $\mu\text{M}$ | Aragonite / wt.% | Mg-calcite / wt.% |
|-------------------------|------------------|-------------------|
| blank                   | 93               | 7                 |
| 4                       | 98               | 2                 |
| 40                      | 76               | 24                |
| 400                     | 4                | 96                |

**Table S15.** Cell parameters and distortions of calcite crystals grown in the presence of different calcein concentrations.

|                       | Blank       | 4 $\mu\text{M}$ | 40 $\mu\text{M}$ | 400 $\mu\text{M}$ |
|-----------------------|-------------|-----------------|------------------|-------------------|
| a, Å                  | 4.99053(5)  | 4.99059(4)      | 4.99066(6)       | 4.99048(2)        |
| <i>distortions, a</i> |             | 1.0E-05         | 2.4E-05          | -1.2E-05          |
| c, Å                  | 17.06772(8) | 17.06868(8)     | 17.0713(1)       | 17.07949(4)       |
| <i>distortions, c</i> |             | 5.6E-05         | 2.1E-04          | 6.9E-04           |

**Table S16.** Cell parameters and distortions of aragonite and Mg-calcite crystals grown in the presence of different calcein concentrations.

| phase                 | Blank     |            | 4 $\mu\text{M}$ |            | 40 $\mu\text{M}$ |            | 400 $\mu\text{M}$ |            |
|-----------------------|-----------|------------|-----------------|------------|------------------|------------|-------------------|------------|
|                       | Aragonite | Mg-calcite | Aragonite       | Mg-calcite | Aragonite        | Mg-calcite | Aragonite         | Mg-calcite |
| a, Å                  | 4.9626(1) | 4.943(2)   | 4.96340(8)      | 4.9489(7)  | 4.9628(1)        | 4.9503(4)  | 4.9566(8)         | 4.937(5)   |
| <i>distortions, a</i> |           |            | 1.6E-04         | 1.2E-03    | 4.0E-05          | 1.5E-03    | -1.2E-03          | -1.2E-03   |
| b, Å                  | 7.9680(2) | 4.943(2)   | 7.9687(1)       | 4.9489(7)  | 7.9683(2)        | 4.9503(4)  | 7.985(2)          | 4.937(5)   |
| <i>distortions, b</i> |           |            | 8.8E-05         | 1.2E-03    | -6.5E-04         | 1.5E-03    | 2.1E-03           | -1.2E-03   |
| c, Å                  | 5.7515(1) | 16.851(3)  | 5.75352(8)      | 16.907(2)  | 5.7517(1)        | 16.8794(7) | 5.7487(9)         | 17.14(13)  |
| <i>distortions, c</i> |           |            | 3.5E-04         | 3.3E-03    | 3.5E-05          | 1.7E-03    | -4.9E-04          | 1.7E-02    |
